# Supplementary material for: Association of EGLN1 genetic polymorphisms with SpO2 responses to acute hypobaric hypoxia in a Japanese cohort
Source: J Physiol Anthropol. 2018 Apr 6;37:9. doi: 10.1186/s40101-018-0169-7 (PMC5889538; doi:10.1186/s40101-018-0169-7)
Supplement: Supplementary file 2 — Table S1. Time series variations of pulmonary and hematological phenotypes in individuals with different genotypes. (XLSX 15 kb) [file 40101_2018_169_MOESM2_ESM.xlsx]

## Sheet: Sheet1
	Table S1. Time series variations of pulmonary and hematological phenotypes in individuals with different genotypes.
	RefSNP ID	Positiona	Region	Genotypeb	2Nc	Corrected MVd					VO2d					VCO2d					Respiratory exchange ratiod					Pulse rated					Perfusion indexd
						0 min	30 min	60 min	90 min		0 min	30 min	60 min	90 min		0 min	30 min	60 min	90 min		0 min	30 min	60 min	90 min		0 min	30 min	60 min	90 min		0 min	30 min	60 min	90 min
	rs480902	1: 231,395,881	EGLN1 intron 1	CC	14	7.7±0.44	7.3±0.53	7.9±0.39	7.3±0.34		3.9±0.24	3.4±0.26	3.5±0.20	3.5±0.14		2.9±0.20	2.7±0.22	2.8±0.16	2.7±0.1		0.7±0.02	0.8±0.01	0.8±0.01	0.8±0.02		77.2±2.92	80.4±2.65	85.9±3.52	73.1±2.98		0.6±0.11	0.6±0.08	0.6±0.08	0.7±0.09
				TC	26	8.6±0.32	8.2±0.34	8.7±0.27	7.9±0.33		4.0±0.19	3.7±0.15	3.8±0.12	3.9±0.16		3.1±0.16	3.0±0.13	3.1±0.13	3.0±0.15		0.8±0.01	0.8±0.01	0.8±0.02	0.8±0.01		76.7±1.90	82.7±1.97	89.3±2.08	74.8±2.01		0.6±0.06	0.7±0.06	0.7±0.05	0.8±0.08
				TT	6	7.4±0.88	6.9±0.79	8.7±0.62	7.4±0.41		3.5±0.51	3.0±0.39	3.6±0.14	3.6±0.21		2.7±0.39	2.5±0.36	3.1±0.18	2.7±0.16		0.8±0.02	0.8±0.02	0.9±0.03	0.7±0.02		71.0±1.28	78.2±1.01	84.9±1.95	73.3±1.95		0.6±0.15	0.6±0.14	0.6±0.11	0.6±0.10
	rs479200	1: 231,408,034	EGLN1 intron 1	TT	17	7.9±0.40	7.7±0.52	8.2±0.39	7.4±0.30		3.8±0.21	3.5±0.23	3.5±0.17	3.5±0.14		2.8±0.17	2.8±0.19	2.8±0.14	2.7±0.1		0.7±0.01	0.8±0.01	0.8±0.01	0.8±0.01		76.1±2.65	79.3±2.32	85.3±3.00	73.2±2.62		0.6±0.09	0.6±0.07	0.6±0.07	0.6±0.07
				TC	22	8.6±0.36	8.1±0.36	8.6±0.29	7.9±0.38		4.1±0.21	3.7±0.17	3.8±0.14	3.9±0.17		3.1±0.18	3.1±0.15	3.1±0.15	3.0±0.16		0.8±0.01	0.8±0.01	0.8±0.02	0.8±0.02		77.1±2.05	83.6±2.16	90.2±2.32	74.6±2.23		0.7±0.07	0.7±0.07	0.7±0.06	0.8±0.09
				CC	7	7.5±0.76	6.9±0.67	8.7±0.52	7.5±0.35		3.5±0.44	3.0±0.33	3.6±0.12	3.6±0.18		2.7±0.33	2.5±0.31	3.1±0.16	2.7±0.13		0.8±0.02	0.8±0.02	0.9±0.02	0.7±0.02		72.8±2.17	79.9±1.86	85.8±1.92	74.7±2.19		0.6±0.12	0.6±0.12	0.6±0.09	0.6±0.09
	rs2808611	1: 231,412,734	EGLN1 intron 1	AA	15	7.9±0.45	7.3±0.64	8.0±0.44	7.1±0.43		3.8±0.21	3.2±0.25	3.4±0.18	3.4±0.19		2.8±0.17	2.6±0.22	2.7±0.17	2.5±0.14		0.7±0.02	0.8±0.01	0.8±0.03	0.8±0.02		76.5±2.76	79.2±2.44	85.2±3.06	72.3±2.72		0.6±0.10	0.6±0.08	0.6±0.07	0.7±0.08
				GA	23	8.7±0.33	8.2±0.28	8.7±0.26	8.1±0.30		4.2±0.20	3.8±0.15	3.9±0.13	4.0±0.13		3.2±0.17	3.1±0.13	3.2±0.13	3.1±0.13		0.8±0.01	0.8±0.01	0.8±0.01	0.8±0.01		78.5±1.84	84.8±1.94	91.2±2.21	76.3±2.14		0.6±0.07	0.7±0.07	0.7±0.06	0.8±0.09
				GG	8	7.3±0.65	7.4±0.66	8.8±0.49	7.4±0.32		3.4±0.38	3.2±0.32	3.6±0.13	3.6±0.18		2.6±0.29	2.7±0.29	3.1±0.16	2.7±0.14		0.8±0.01	0.8±0.02	0.9±0.02	0.8±0.02		68.4±1.99	75.7±1.83	82.4±2.23	70.8±2.23		0.6±0.12	0.6±0.11	0.6±0.08	0.6±0.08
	rs12097901	1: 231,421,509	EGLN1 exon 1	GG	14	7.7±0.48	7.8±0.32	8.1±0.23	7.7±0.35		3.6±0.28	3.5±0.14	3.5±0.16	3.6±0.17		2.7±0.23	2.9±0.12	2.9±0.15	2.8±0.15		0.8±0.01	0.8±0.01	0.8±0.01	0.8±0.02		76.5±3.3	80.6±2.91	85.4±3.01	70.7±3.13		0.7±0.07	0.7±0.07	0.7±0.07	0.8±0.11
				CG	21	8.3±0.36	7.9±0.36	8.2±0.32	7.7±0.34		4.1±0.21	3.7±0.19	3.7±0.16	3.9±0.14		3.1±0.18	3.0±0.17	3.1±0.15	3.0±0.14		0.8±0.02	0.8±0.01	0.8±0.01	0.8±0.02		78.3±1.95	83.8±2.18	90.3±2.75	77.2±2.1		0.6±0.09	0.7±0.07	0.7±0.06	0.7±0.09
				CC	11	8.5±0.57	7.6±0.87	9.4±0.49	7.4±0.50		3.9±0.27	3.3±0.36	3.9±0.14	3.6±0.26		3.0±0.18	2.7±0.3	3.1±0.20	2.7±0.19		0.8±0.01	0.8±0.02	0.8±0.04	0.7±0.01		71.3±1.37	77.8±1.11	85.7±1.55	72.4±1.83		0.5±0.09	0.5±0.09	0.5±0.06	0.5±0.05
	rs2790859	1: 231,465,611	Intergenic region	TT	16	8.0±0.45	7.6±0.49	8.5±0.40	7.5±0.37		3.7±0.26	3.3±0.21	3.6±0.15	3.6±0.19		2.8±0.22	2.7±0.19	2.9±0.16	2.7±0.15		0.8±0.01	0.8±0.01	0.8±0.03	0.7±0.01		73.2±2.27	78.3±2.22	84.9±2.67	71.7±2.65		0.6±0.10	0.6±0.08	0.6±0.07	0.6±0.08
				TC	25	8.5±0.34	7.6±0.39	8.4±0.30	7.6±0.28		4.2±0.17	3.6±0.19	3.8±0.14	3.9±0.13		3.2±0.14	2.9±0.16	3.2±0.13	3.0±0.13		0.8±0.01	0.8±0.01	0.8±0.01	0.8±0.01		77.1±1.61	82.8±1.72	89.5±2.07	75.7±1.81		0.7±0.06	0.7±0.06	0.7±0.06	0.8±0.08
				CC	5	7.2±0.62	8.9±0.33	8.7±0.25	8.2±0.91		3.2±0.45	3.6±0.19	3.4±0.24	3.3±0.26		2.3±0.31	3.0±0.17	2.8±0.20	2.7±0.20		0.7±0.03	0.8±0.02	0.8±0.02	0.8±0.02		80.1±7.43	84.4±6.09	87.6±6.48	73.5±5.42		0.5±0.07	0.5±0.08	0.5±0.11	0.6±0.17
	Abbreviations: MV, minute ventilation. VO2, oxygen consumption. VCO2, carbon-dioxide output. PR, pulse rate. PI, perfusion index. a Position in NCBI build GRCh38. b Highlander alleles are shown in bold (see Table 1). c The number of chromosomes. d Quantitative data are presented as the mean ± standard error of the mean.
